# Supplementary material
Source: PubMed Central journal article supplement (PMC4253301)
Supplement: Supp_Figure1.pdf [file Supp_Figure1.pdf]

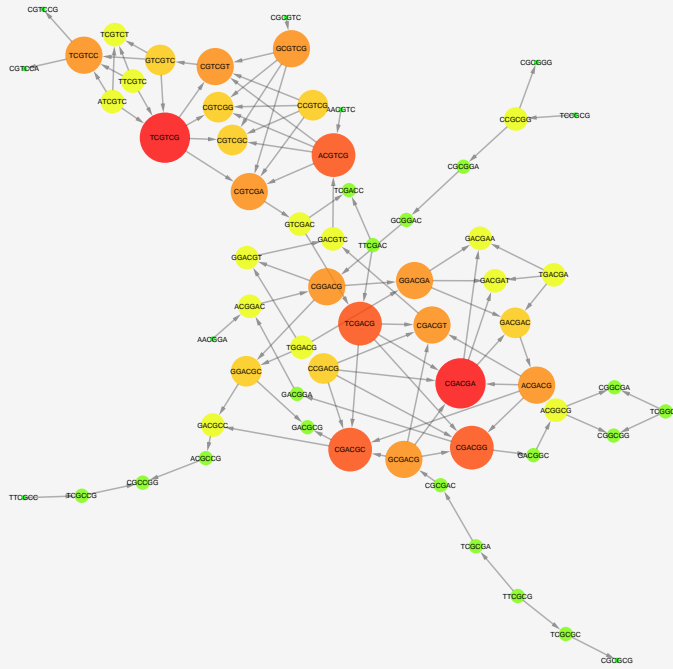

Figure S1: An example of the weakly connected component for ESEs where  $R=100$ . The vertex color and size is relative to its degree.
