# Supplementary material
Source: PubMed Central journal article supplement (PMC4253301)

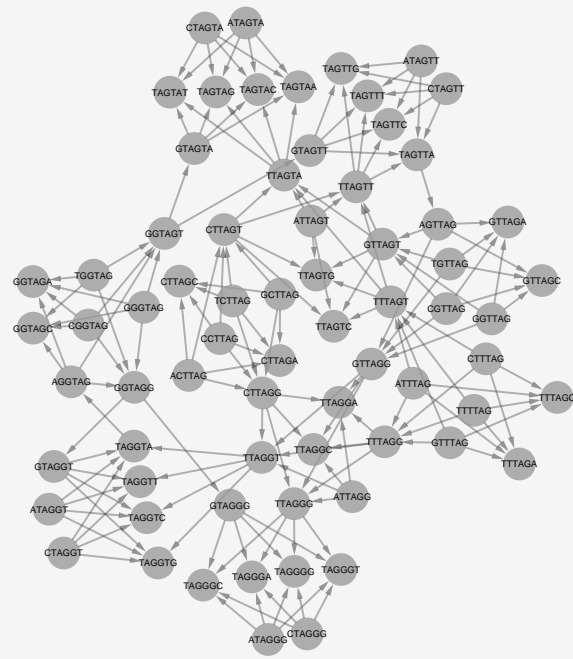

Figure S2: The most influential nodes in the largest weakly connected components for ESSs.

Supplement: Supp_Figure2.pdf [file Supp_Figure2.pdf]
